# Supplementary material for: Controlled synthesis of M doped NiVS (M = Co, Ce and Cr) as a robust electrocatalyst for urea electrolysis
Source: Royal Society of Chemistry journal article supplement (doi:10.1039/d3dt02586a), 2023-01-01
Supplement: d3dt02586a1.pdf [file d3dt02586a1.pdf]

## Controlled synthesis of M doped NiVS (M=Co, Ce and Cr) as robust electrocatalyst for urea electrolysis

Chao Wang<sup>a</sup>, Qirun Wang<sup>a</sup>, Xiaoqiang Du<sup>a\*</sup> and Xiaoshuang Zhang<sup>b</sup>

<sup>a</sup> School of Chemistry and Chemical Engineering, North University of China, Xueyuan road 3, Taiyuan 030051, People's Republic of China. E-mail: duxq16@nuc.edu.cn

<sup>b</sup> School of Environment and Safety Engineering, North University of China, Xueyuan road 3, Taiyuan 030051, People's Republic of China.

**DFT computation details:** The DFT calculations were performed using the Cambridge Sequential Total Energy Package (CASTEP) with the plane-wave pseudo-potential method. The geometrical structures of the (110) and (011) plane of NiS and VS<sub>4</sub> was optimized by the generalized gradient approximation (GGA) methods. The Revised Perdew-Burke-Ernzerh of (RPBE) functional was used to treat the electron exchange correlation interactions. A Monkhorst Pack grid k-points of 6\*6\*1 and 5\*2\*1 of NiS and VS<sub>4</sub>, a plane-wave basis set cut-off energy of 500 eV were used for integration of the Brillouin zone. The structures were optimized for energy and force convergence set at 0.05 eV/Å and 2.0×10<sup>-5</sup> eV, respectively. The Gibbs free energy of H adsorption was calculated as follows:

$$\Delta G_{H^*} = \Delta E_{H^*} + \Delta ZPE - T\Delta S$$

Where  $\Delta ZPE$  is the zero-point energy and  $T\Delta S$  stands for the entropy corrections. According to the previous report by Norskov et al., we used the 0.24 eV for the  $\Delta ZPE - T\Delta S$  of hydrogen adsorption in this work.

Res: J. Electrochem. Soc., **2005**, 152, J23.

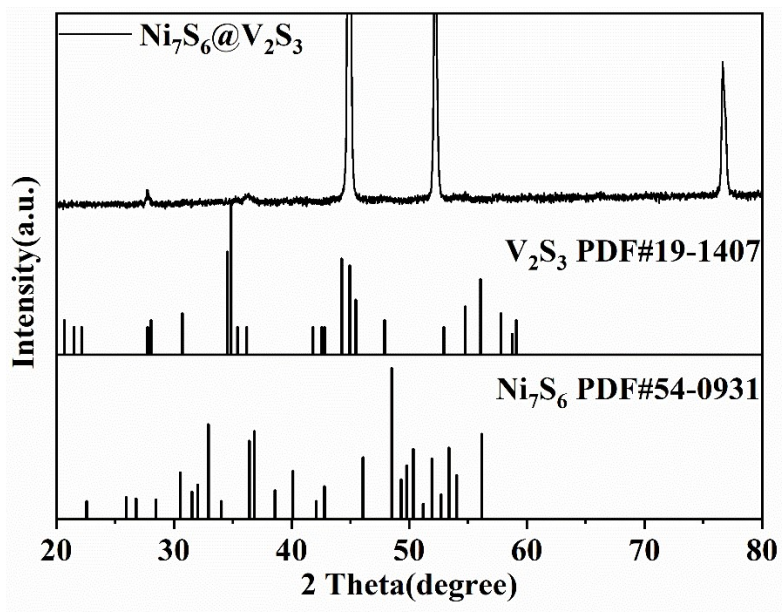

Fig. S1. XRD of NiVS.

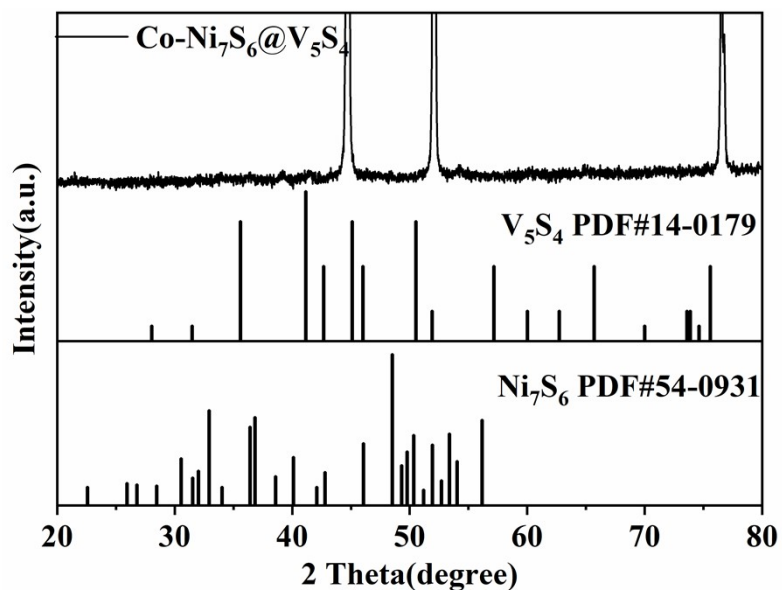

Fig. S2 XRD of Co-NiVS.

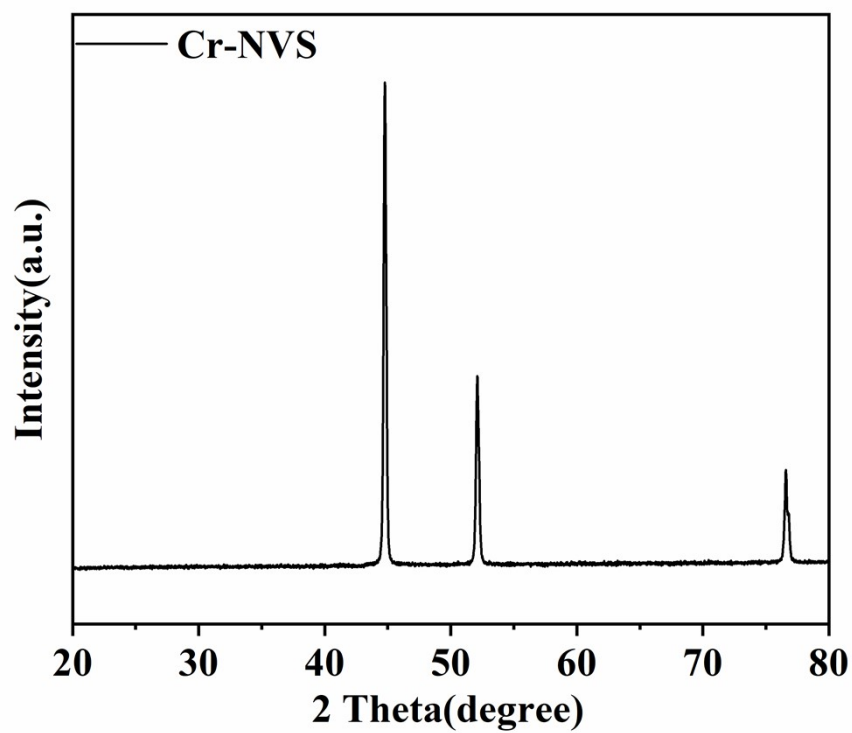

Fig. S3 XRD of Cr-NiVS.

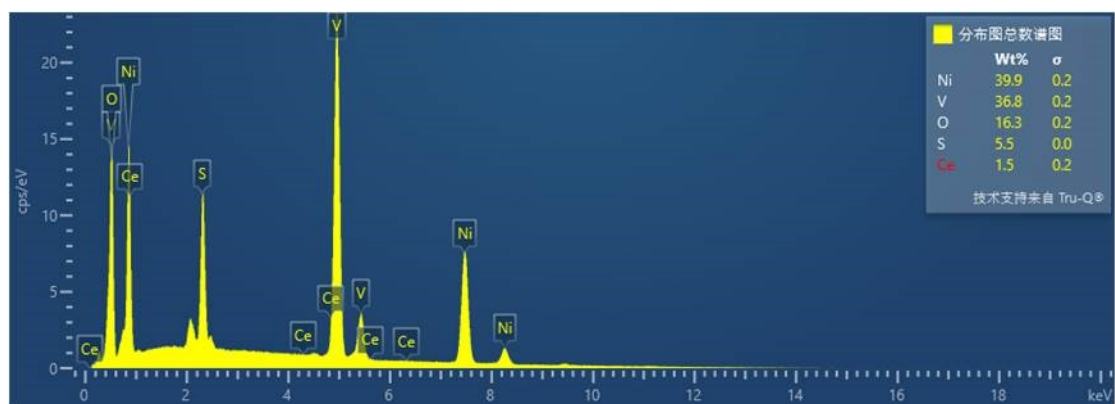

Fig. S4 Quantitative analysis of EDS characterization of Ce-NiVS catalyst.

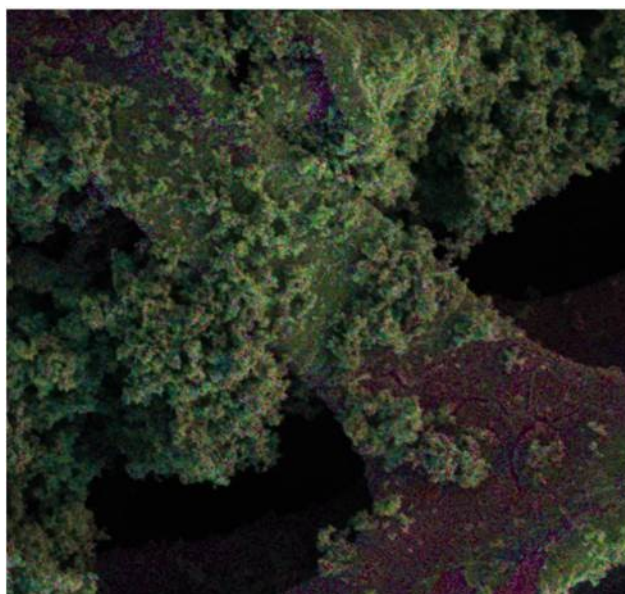

Fig. S5 EDS layered images.

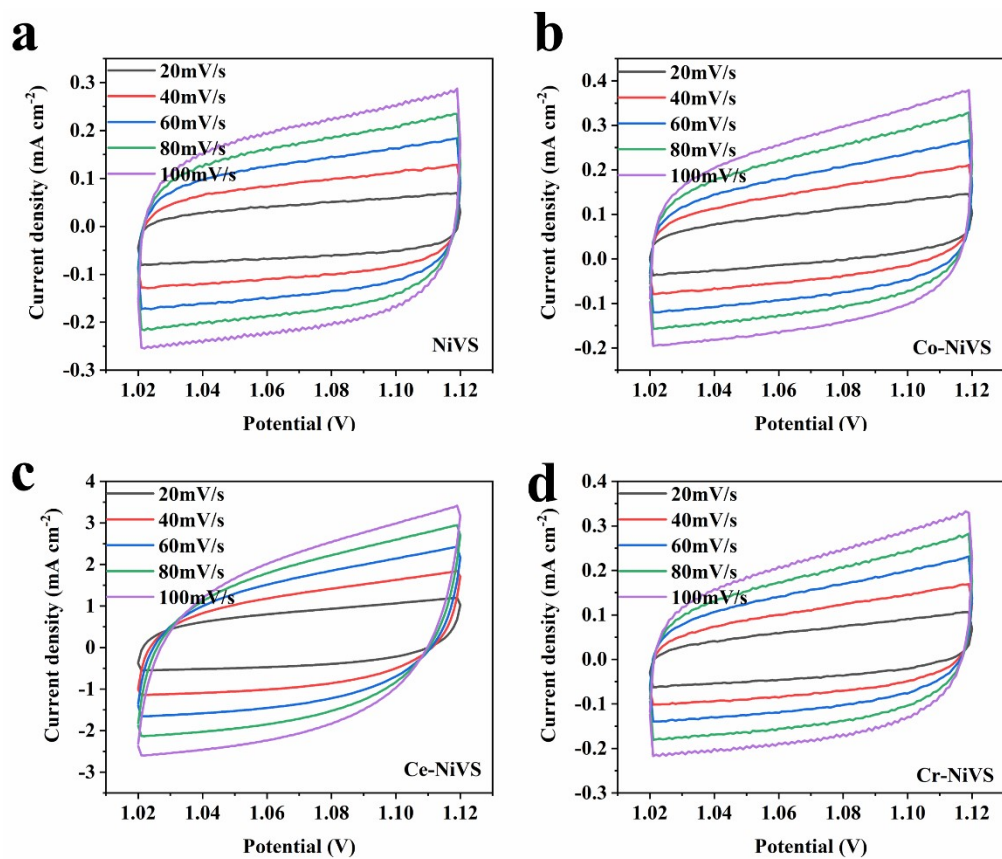

Fig. S6. CV curves of UOR: (a) NiVS, (b) Co-NiVS, (c) Ce-NiVS, (d) Cr-NiVS.

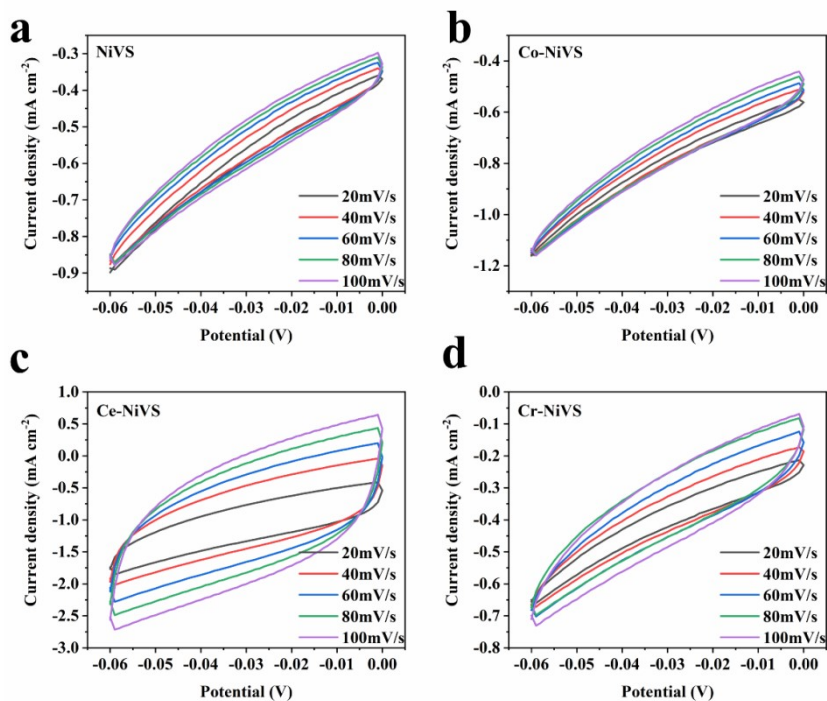

**Fig. S7.** CV curves of HER: (a) NiVS, (b) Co-NiVS, (c) Ce-NiVS, (d) Cr-NiVS.

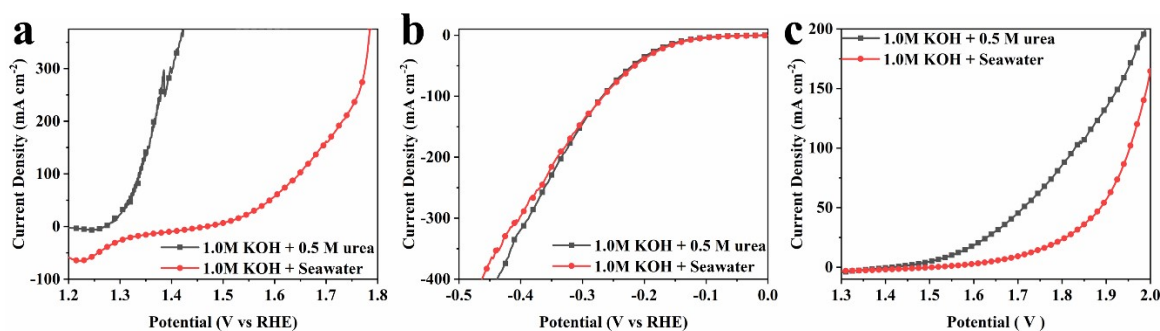

**Fig. S8.** Comparison of the properties of Ce-NiVS catalysts in alkaline urea and alkaline seawater: (a) anode reaction, (b) cathode reaction, (c) total hydrolysis.

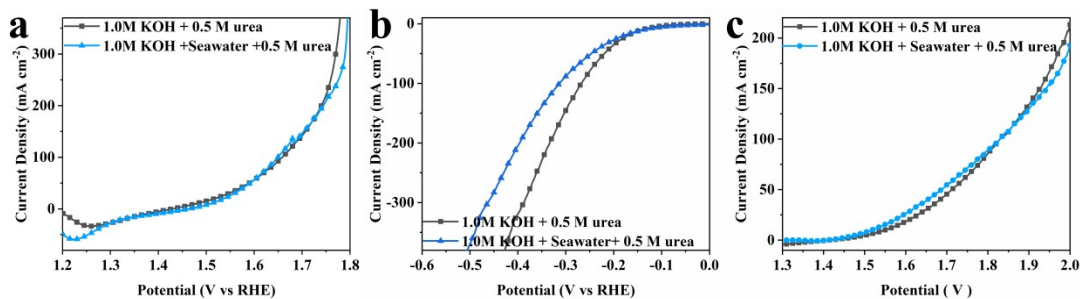

**Fig. S9.** Comparison of the properties of Ce-NiVS catalysts in alkaline urea and alkaline urea seawater: (a) anode reaction, (b) cathode reaction, (c) total hydrolysis.

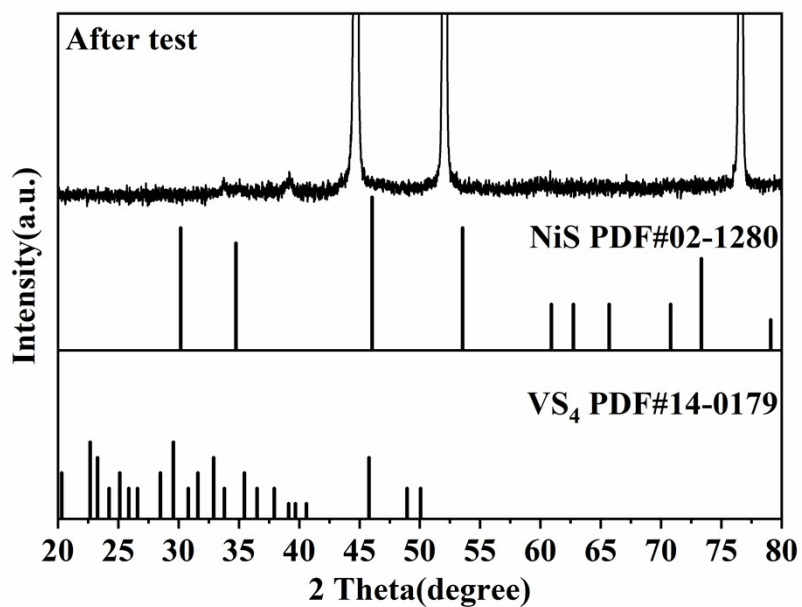

Fig. S10. XRD image of Ce-NiVS catalyst after stability test.

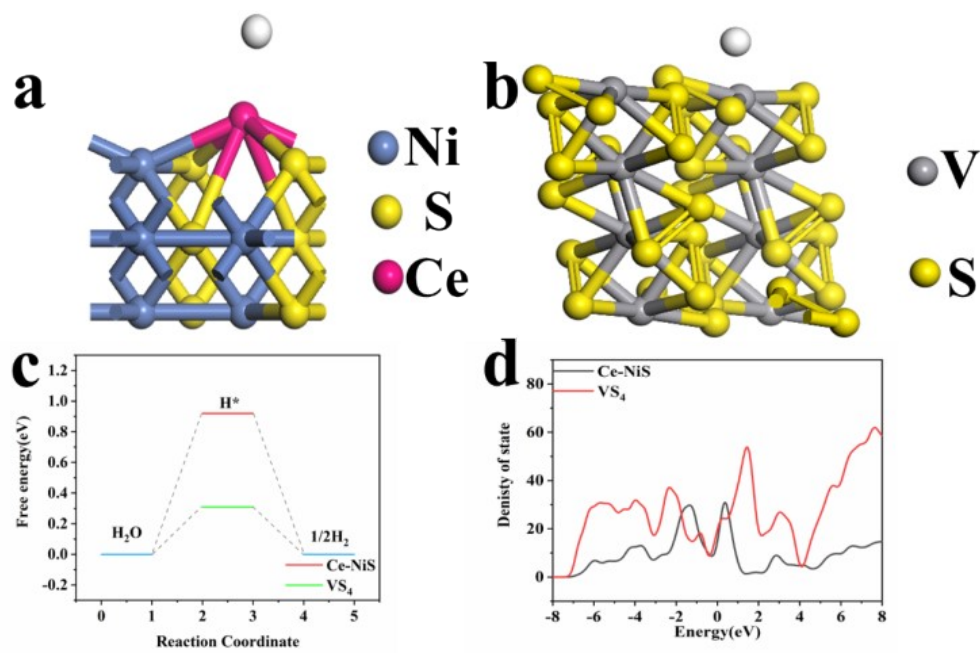

Fig. S11 (a-b) Adsorption models of H\* on Ce-NiS and VS<sub>4</sub>, (c) obtained free energy diagram for HER, (d) obtained H\* state densities of Ce-NiS and VS<sub>4</sub>.

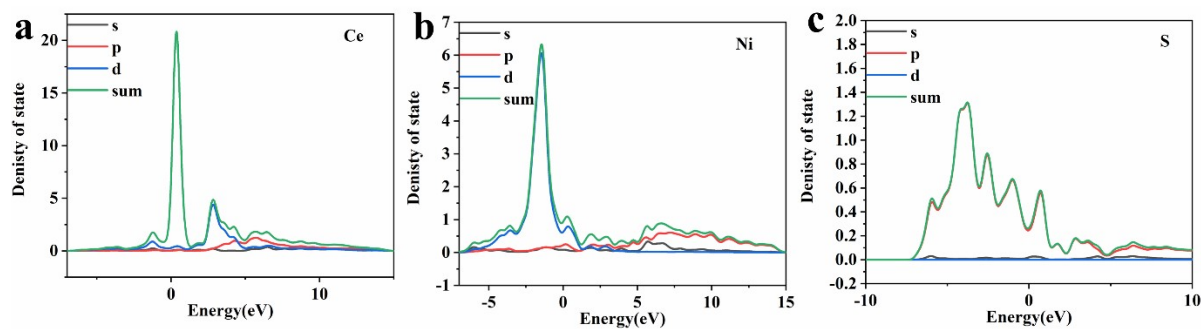

**Fig. S12.** Density of states for Ce-NiS, (a) Ce, (b) Ni, (c) S.

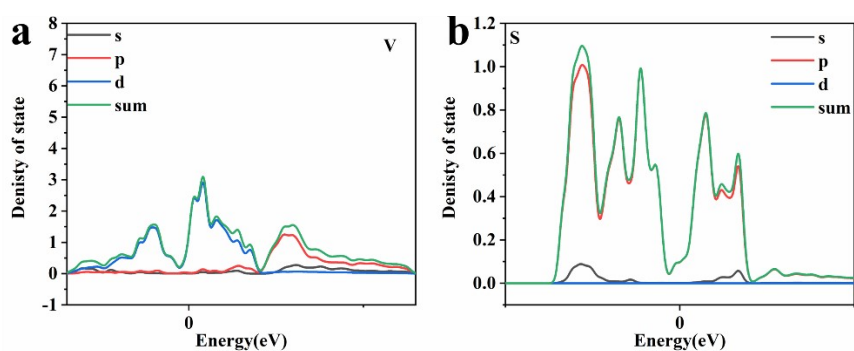

**Fig. S13.** Density of states for VS<sub>4</sub>, (a) V, (b) S.

**Table S1.** Comparison of this work for UOR in 1.0 M KOH with 0.5 M urea solution with other works

| Catalyst                        | $j / \text{mA cm}^{-2}$ | Voltage / V | Reference |
|---------------------------------|-------------------------|-------------|-----------|
| Ce-NiVS                         | 10                      | 1.29        | This work |
| NiMoO <sub>4</sub>              | 10                      | 1.37        | [1]       |
| CoS <sub>2</sub> /Ti mesh       | 10                      | 1.40        | [2]       |
| NiMo@ZnO/NF                     | 10                      | 1.405       | [3]       |
| Ni <sub>2</sub> P/CFC           | 10                      | 1.42        | [4]       |
| Ni(OH) <sub>2</sub> nanotube-NF | 10                      | 1.41        | [5]       |
| NiCo alloy                      | 10                      | 1.53        | [6]       |

**Table S2.** Comparison of the HER performance for Ce-NiVS catalyst with other reported catalysts in alkaline solution

| Catalyst                                           | $j / \text{mA cm}^{-2}$ | Overpotential / mV | Reference |
|----------------------------------------------------|-------------------------|--------------------|-----------|
| Ce-NiVS                                            | 10                      | 141                | This work |
| NiCo/NiCoO <sub>x</sub>                            | 10                      | 155                | [7]       |
| CoO <sub>x</sub> @CN                               | 10                      | 232                | [8]       |
| Co <sub>9</sub> S <sub>8</sub> @NiCo LDH           | 10                      | 168                | [9]       |
| Co-Ni <sub>3</sub> N                               | 10                      | 180                | [10]      |
| MoS <sub>2</sub> /NiCoS                            | 10                      | 189                | [11]      |
| MoO <sub>3</sub> -MoS <sub>2</sub> /FTO            | 10                      | 310                | [12]      |
| Co <sub>0.6</sub> Mo <sub>1.4</sub> N <sub>2</sub> | 10                      | 200                | [13]      |

**Table S3.** Comparison of the performance of urea electrolysis for Ce-NiVS catalyst with other reported catalysts in alkaline solution

| Catalyst                                           | potential (V<br>at 10 mA<br>cm <sup>-2</sup> ) | Electrolyte             | Reference    |
|----------------------------------------------------|------------------------------------------------|-------------------------|--------------|
| Ce-NiVS                                            | 1.50                                           | 1.0 MKOH+<br>0.5M urea  | This<br>work |
| MnO <sub>2</sub> /MnCo <sub>2</sub> O <sub>4</sub> | 1.58                                           | 1.0 MKOH+<br>0.5M urea  | [14]         |
| NP-Ni <sub>0.70</sub> Fe <sub>0.30</sub>           | 1.55                                           | 1.0 MKOH+<br>0.33M urea | [15]         |
| Pt/C  IrO <sub>2</sub>                             | 1.72                                           | 1.0 MKOH+<br>0.5M urea  | [16]         |
| CoS <sub>2</sub> /Ti mesh                          | 1.59                                           | 1.0 MKOH+<br>0.3M urea  | [2]          |
| Ni-WxC/CNTs  WxC/<br>CNTs                          | 1.65                                           | 1.0 MKOH+<br>0.33M urea | [17]         |



## Reference

- [1] Z.-Y. Yu, C.-C. Lang, M.-R. Gao, Y. Chen, Q.-Q. Fu, Y. Duan, S.-H. Yu, Ni-Mo-O nanorod-derived composite catalysts for efficient alkaline water-to-hydrogen conversion via urea electrolysis; *Energy Environ. Sci.*, 2018;11: 1890-7.
- [2] S. Wei, X. Wang, J. Wang, X. Sun, L. Cui, W. Yang, Y. Zheng, J. Liu, CoS<sub>2</sub> nanoneedle array on Ti mesh: A stable and efficient bifunctional electrocatalyst for urea-assisted electrolytic hydrogen production; *Electrochim. Acta*, 2017;246: 776-82.
- [3] J. Cao, H. Li, R. Zhu, L. Ma, K. Zhou, Q. Wei, F. Luo, Improved hydrogen generation via a urea-assisted method over 3D hierarchical NiMo-based composite microrod arrays; *J. Alloys Compd.*, 2020;844: 155382.
- [4] X. Zhang, Y. Liu, Q. Xiong, G. Liu, C. Zhao, G. Wang, Y. Zhang, H. Zhang, H. Zhao, Vapour-phase hydrothermal synthesis of Ni<sub>2</sub>P nanocrystallines on carbon fiber cloth for high-efficiency H<sub>2</sub> production and simultaneous urea decomposition; *Electrochim. Acta*, 2017;254: 44-9.
- [5] R.-Y. Ji, D.-S. Chan, J.-J. Jow, M.-S. Wu, Formation of open-ended nickel hydroxide nanotubes on three-dimensional nickel framework for enhanced urea electrolysis; *Electrochem. Commun.*, 2013;29: 21-4.
- [6] W. Xu, H. Zhang, G. Li, Z. Wu, Nickel-cobalt bimetallic anode catalysts for direct urea fuel cell; *Scientific Reports*, 2014;4: 5863.
- [7] X. Yan, K. Li, L. Lyu, F. Song, J. He, D. Niu, L. Liu, X. Hu, X. Chen, From Water Oxidation to Reduction: Transformation from Ni<sub>x</sub>Co<sub>3-x</sub>O<sub>4</sub> Nanowires to NiCo/NiCoOx Heterostructures; *ACS Appl. Mater. Interfaces*, 2016;8: 3208-14.
- [8] H. Fei, J. Dong, M.J. Arellano-Jimenez, G. Ye, N.D. Kim, E.L.G. Samuel, Z. Peng, Z. Zhu, F. Qin, J. Bao, M.J. Yacaman, P.M. Ajayan, D. Chen, J.M. Tour, Atomic cobalt on nitrogen-doped graphene for hydrogen generation; *Nat. Commun.*, 2015;6: 8668.
- [9] C. Qin, A. Fan, X. Zhang, S. Wang, X. Yuan, X. Dai, Interface engineering: few-layer MoS<sub>2</sub> coupled to a NiCo-sulfide nanosheet heterostructure as a bifunctional electrocatalyst for overall water splitting; *J. Mater. Chem. A*, 2019;7: 27594-602.
- [10] S. Deng, Y. Zhong, Y. Zeng, Y. Wang, X. Wang, X. Lu, X. Xia, J. Tu, Hollow TiO<sub>2</sub>@Co<sub>9</sub>S<sub>8</sub>

Core-Branch Arrays as Bifunctional Electrocatalysts for Efficient Oxygen/Hydrogen Production; *Adv. Sci.*, 2018;5: 1700772.

[11] C. Zhu, A.-L. Wang, W. Xiao, D. Chao, X. Zhang, T. Nguyen Huy, S. Chen, J. Kang, X. Wang, J. Ding, J. Wang, H. Zhang, H.J. Fan, In Situ Grown Epitaxial Heterojunction Exhibits High-Performance Electrocatalytic Water Splitting; *Adv. Mater.*, 2018;30: 1705516.

[12] Z. Chen, D. Cummins, B.N. Reinecke, E. Clark, M.K. Sunkara, T.F. Jaramillo, Core-shell MoO<sub>3</sub>-MoS<sub>2</sub> Nanowires for Hydrogen Evolution: A Functional Design for Electrocatalytic Materials; *Nano Letters*, 2011;11: 4168-75.

[13] B. Cao, G.M. Veith, J.C. Neuefeind, R.R. Adzic, P.G. Khalifah, Mixed Close-Packed Cobalt Molybdenum Nitrides as Non-noble Metal Electrocatalysts for the Hydrogen Evolution Reaction; *J. Am. Chem. Soc.*, 2013;135: 19186-92.

[14] C. Xiao, S. Li, X. Zhang, D.R. MacFarlane, MnO<sub>2</sub>/MnCo<sub>2</sub>O<sub>4</sub>/Ni heterostructure with quadruple hierarchy: a bifunctional electrode architecture for overall urea oxidation; *J. Mater. Chem. A*, 2017;5: 7825-32.

[15] Z. Cao, T. Zhou, X. Ma, Y. Shen, Q. Deng, W. Zhang, Y. Zhao, Hydrogen Production from Urea Sewage on NiFe-Based Porous Electrocatalysts; *ACS Sustainable Chem. Eng.*, 2020;8: 11007-15.

[16] S. Chen, J. Duan, A. Vasileff, S.Z. Qiao, Size Fractionation of Two-Dimensional Sub-Nanometer Thin Manganese Dioxide Crystals towards Superior Urea Electrocatalytic Conversion; *Angew. Chem. Int. Ed.*, 2016;55: 3804-8.

[17] J. Fan, Y. Dou, R. Jiang, K. Du, B. Deng, D. Wang, Electro-synthesis of tungsten carbide containing catalysts in molten salt for efficiently electrolytic hydrogen generation assisted by urea oxidation; *Int. J. Hydrogen Energy*, 2021;46: 14932-43.
